# Supplementary material
Source: PubMed Central journal article supplement (PMC6226059)

# Supplemental Figure 4

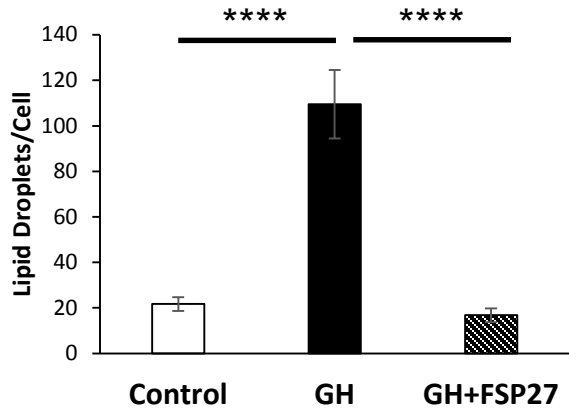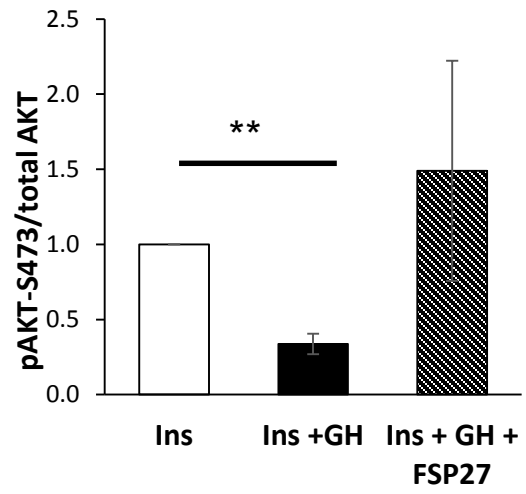

Supplement: NIHMS1509149-supplement-04.pdf [file NIHMS1509149-supplement-04.pdf]
